# Supplementary material for: Immune Profiling Panel Gene Set Identifies Critically Ill Patients With Low Monocyte Human Leukocyte Antigen-DR Expression: Preliminary Results From the REAnimation Low Immune Status Marker (REALISM) Study
Source: PubMed Central journal article supplement — Crit Care Med. 2023 Mar 14;51(6):808–16. doi: 10.1097/CCM.0000000000005832 (PMC10187625; doi:10.1097/ccm.0000000000005832), 2023-03-14
Supplement: ccm-51-808-s001.pdf [file ccm-51-808-s001.pdf]

## Supplemental digital content

### Immune Profiling Panel gene set identifies critically ill patients with low monocyte HLA-DR expression: preliminary results from the REALISM study

Estelle Peronnet, Sophie Blein, Fabienne Venet, Elisabeth Cerrato, Aurore Fleurie, Jean-François Llitjos, Louis Kreitmann, Gabriel Terraz, Filippo Conti, Morgane Gossez, Thomas Rimmelé, Julien Textoris, Anne-Claire Lukaszewicz, Karen Brengel-Pesce, Guillaume Monneret, for the REALISM study group

#### Table of contents

**eFigure 1.** Distribution of the expression levels of the IPP markers in healthy volunteers (HV) and in groups of samples defined according to patients' immune status.

**eFigure 2.** Immune status defined by IPP over time in **(A)** all patients and **(B)** according to patient etiology, in test set.

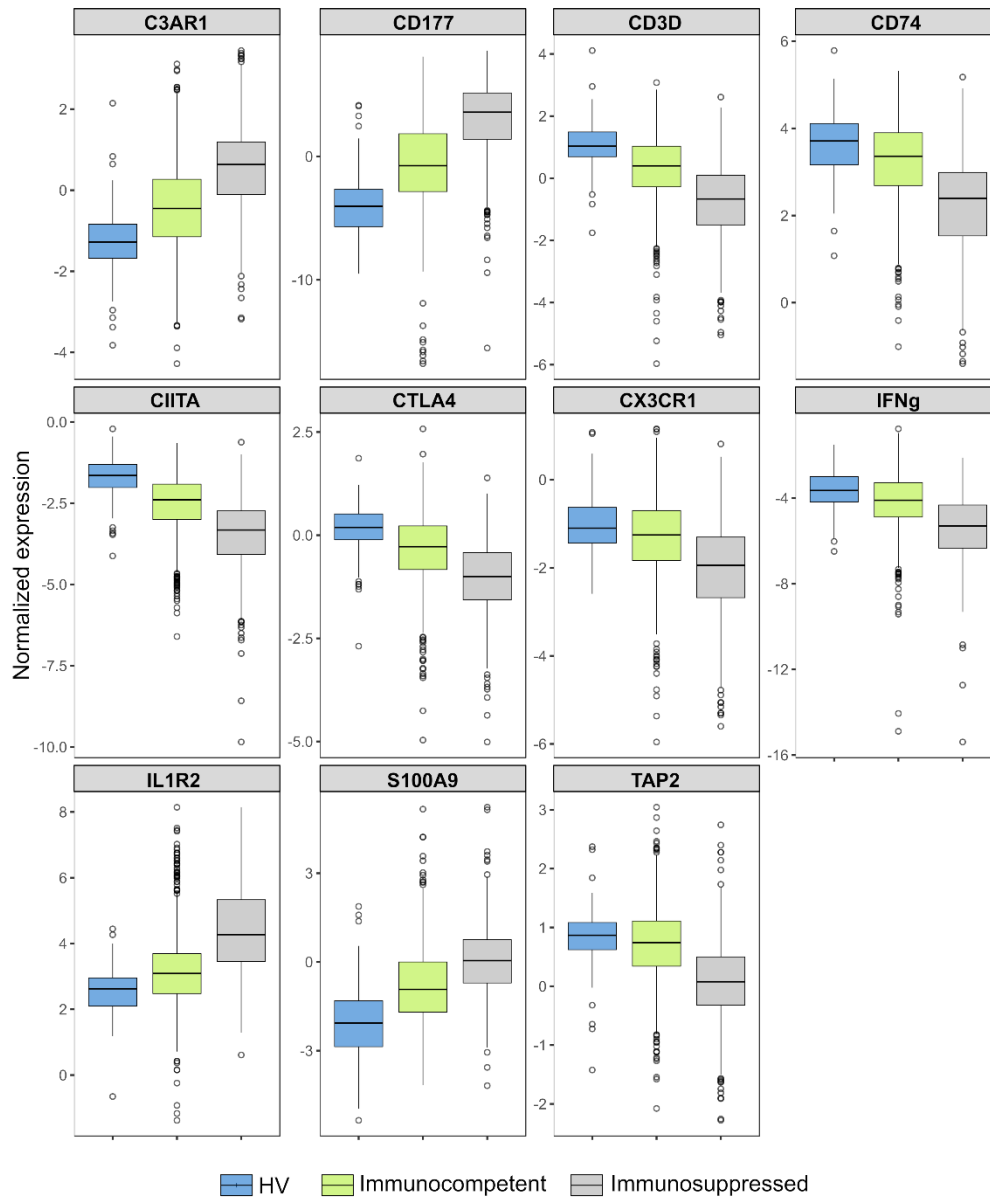

**eFigure 1. Distribution of the expression levels of the IPP markers in healthy volunteers (HV) and in groups of samples defined according to patients' immune status.** Expression values of all genes were significantly different between immunocompetent and immunosuppressed patients groups (Mann-Whitney test,  $p < 0.001$ ).  $n = 163$  samples from healthy volunteers,  $n = 977$  samples in the group with mHLA-DR  $> 8,000$  AB/C (immunocompetent) and  $n = 591$  samples in the group with mHLA-DR  $< 8,000$  AB/C (immunosuppressed).

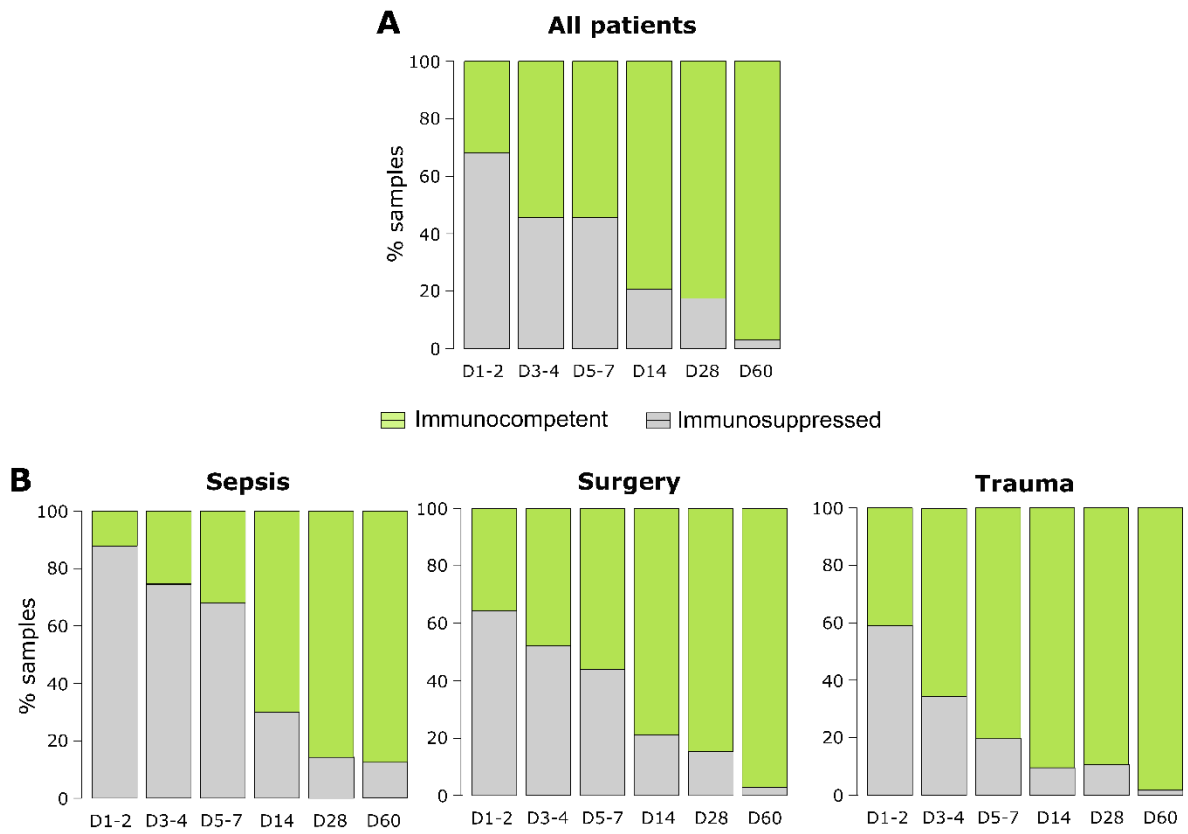

**eFigure 2.** Immune status defined by IPP over time in **(A)** all patients and **(B)** according to patient etiology, in test set.
